# Supplementary material
Source: publisher site journal article supplement (https://static.cambridge.org/content/id/urn:cambridge.org:id:article:S1368980020001056/resource/name/S1368980020001056supp002.docx)
Supplement: Supplementary file 1 [file S1368980020001056supp002.docx]

**Supplementary Table 2: Factor scores for the prudent pattern, junk food pattern and selected variables relevant from the perspective of SES**

Factor scores for PRUDENT PATTERN JUNK FOOD PATTERN

7 years 11 years 15 years 7 years 11 years 15 years

Girls Boys Girls Boys Girls Boys Girls Boys Girls Boys Girls Boys

Maternal education

Elementary -0.18 ± 0.99a -0.11 ± 1.08 -0.09 ± 1.05a -0.15 ± 1.08 -0.26 ± 1.01a 0.00±0.99 0.15 ± 0.99ab 0.18 ± 0.99a -0.05 ± 1.07 0.12 ± 1.08 0.03 ± 1.11a 0.42 ± 1.04

Secondary0.12 ± 0.94a -0.06 ± 1.00 0.04 ± 0.94 0.01 ± 1.05 -0.05 ± 1.01 0.03±1.06 -0.06 ± 0.96ac 0.05 ± 0.99b -0.08 ± 1.00 0.02 ± 0.95 -0.21 ± 0.95 0.19 ± 0.96

College/higher0.03 ± 0.89 0.07 ± 0.99 0.14 ± 0.87a 0.05 ± 0.99 0.16 ± 0.94a 0.04 ± 0.92 -0.30 ± 0.91bc -0.23 ± 0.94ab 0.02 ± 0.95 -0.04 ± 0.95 -0.40 ± 0.85a 0.14 ± 0.94

Maternal age at pregnancy

<20 0.02 ± 0.95 0.00 ± 1.07 -0.10 ± 1.06 0.15 ± 1.02 0.02 ± 1.01 -0.03 ± 0.93 0.28 ± 1.06ab 0.26 ± 1.06a 0.04 ± 1.02 -0.06 ± 1.03 0.18 ± 1.10ab 0.38 ± 1.08

20–30 0.02 ± 0.97 0.00 ± 1.02 0.04 ± 0.94 -0.01 ± 1.01 -0.03 ± 0.97 0.06 ± 0.99 -0.06 ± 0.98a 0.01 ± 1.01 -0.06 ± 1.01 0.09 ± 0.98a -0.24 ± 0.95a 0.26 ± 0.95

≥30 0.04 ± 0.96 -0.11 ± 1.08 0.02 ± 1.00 -0.19 ± 1.13 -0.04 ± 1.11 -0.12 ± 1.05 -0.05 ± 0.97b -0.05 ± 0.99a 0.02 ± 0.98 -0.15 ± 1.00a -0.32 ± 0.95b 0.11 ± 1.02

Maternal BMI before pregnancy

<20 0.00 ± 0.99 0.01 ± 1.04 0.07 ± 0.96 -0.03 ± 1.00 -0.03 ± 0.96 0.06 ± 1.05 -0.03 ± 1.03 0.01 ± 1.01 -0.05 ± 1.00 0.06 ± 1.01 -0.26 ± 1.00 0.35 ± 0.90

20–25 -0.02 ± 0.95 -0.02 ± 1.02 0.05 ± 0.92 -0.02 ± 1.05 0.02 ± 0.99 0.01 ± 1.01 -0.01 ± 1.00 0.00 ± 1.02 0.01 ± 0.99 0.06 ± 0.98 -0.23 ± 0.93 0.21 ± 1.00

25–30 0.21 ± 0.93 -0.05 ± 1.03 -0.03 ± 0.94 -0.10 ± 1.18 0.03 ± 1.17 -0.02 ± 0.90 -0.11 ± 0.93 0.11 ± 0.98 -0.16 ± 0.99 -0.03 ± 0.96 -0.17 ± 0.96 0.09 ± 1.00

≥30 -0.02 ± 1.25 -0.06 ± 1.22 -0.06 ± 0.94 0.17 ± 0.89 -0.11 ± 0.86 -0.05 ± 1.14 0.13 ± 0.93 -0.17 ± 1.02 0.27 ± 1.09 -0.09 ± 0.91 -0.08 ± 1.10 0.21 ± 1.27

Abuse of psychotropic substances

No 0.01 ± 0.97 -0.01 ± 1.03 0.05 ± 0.94 -0.01 ± 1.04a 0.02 ± 1.00 0.04 ± 1.02 -0.04 ± 1.00 0.01 ± 1.02 -0.03 ± 0.99 0.05 ± 0.99 -0.23 ± 0.95 0.22 ± 0.97

Yes 0.23 ± 0.77 -1.04 ± 1.10 -0.04 ± 0.99 -1.41 ± 1.10a -0.06 ± 0.41 -0.09 ± 0.21 0.50 ± 0.80 0.25 ± 0.99 0.64 ± 0.74 0.07 ± 0.45 -0.55 ± 1.07 0.58 ± 0.32

Exposure to alcohol during pregnancy

No 0.00 ± 0.98 -0.01 ± 1.03 0.04 ± 0.95 -0.01 ± 1.02 0.01 ± 1.02 0.05 ± 1.03 -0.04 ± 1.00 0.00 ± 1.02 -0.03 ± 1.00 0.07 ± 0.99 -0.23 ± 0.97 0.23 ± 0.98

Yes -0.01 ± 0.97 0.05 ± 1.04 -0.02 ± 0.89 0.06 ± 1.10 -0.06 ± 0.84 0.06 ± 0.78 0.09 ± 0.98 0.25 ± 1.03 0.28 ± 1.06 0.10 ± 1.00 -0.26 ± 0.96 0.19 ± 0.91

Smoking before pregnancy

Never 0.02 ± 0.96 -0.01 ± 1.02 0.12 ± 0.91 -0.02 ± 1.02 0.11 ± 0.95a 0.04 ± 1.03 -0.11 ± 0.99ab -0.06 ± 1.01a -0.08 ± 0.99 0.03 ± 0.96 -0.27 ± 0.93 0.26 ± 0.97

Past smoker0.04 ± 1.00 0.01 ± 1.07 -0.07 ± 0.96 0.05 ± 1.03a -0.15 ± 1.03a 0.08 ± 1.02 0.09 ± 0.98a 0.11 ± 1.01 0.07 ± 1.03 0.13 ± 1.02 -0.16 ± 0.95 0.19 ± 0.99

Smoker -0.20 ± 1.00 -0.20 ± 1.13 -0.14 ± 1.08 -0.35 ± 1.19a -0.28 ± 1.18 -0.26 ± 1.05 0.25 ± 0.96b 0.38 ± 1.05a 0.06 ± 0.98 0.00 ± 1.03 -0.11 ± 1.26 0.26 ± 0.97

Maternal partner present

Yes 0.03 ± 0.96 -0.01 ± 1.04 0.04 ± 0.95 -0.03 ± 1.04 0.00 ± 0.99 0.03 ± 1.02 -0.03 ± 0.99 0.03 ± 1.01 -0.05 ± 1.00 0.02 ± 0.99 -0.21 ± 0.96 0.25 ± 0.97

No -0.06 ± 0.99 -0.12 ± 0.96 0.01 ± 1.06 -0.09 ± 1.06 -0.17 ± 1.08 0.09 ± 0.93 -0.07 ± 0.99 -0.05 ± 0.96 0.01 ± 1.09 0.12 ± 1.04 -0.22 ± 1.01 0.12 ± 1.08

Differences in factor score distributions between the groups at individual time points were tested for a given variable using ANOVA. Significant differences are always given for one given gender, not across all groups, hence the differences between girls and boys have not been tested in this case.

The upper index between the groups denotes significant differences (< 0.05) for a given post-hoc test (Tukey-Kramer method).
